# Supplementary material for: Prolonged persistence of mutagenic DNA lesions in stem cells
Source: Research Square preprint supplement (doi:10.21203/rs.3.rs-3610927/v1), 2023-11-23
Supplement: Supplementary file 2 [file 82a3b4866cc5a020909d63ca.xlsx]

## Sheet: Individual_metadata
Table S1. Characteristics of subjects
Description of variables
Category	The assigned category of the phylogeny for analysis. In most cases this corresponds to the study ID. However, MPN, CH, ageing and transplant studies are grouped together in the 'Adult_HSPC' category
Sample type	Sample type undergoing WGS in the phylogeny building studies
Number of samples	The number of samples undergoing WGS and included in the phylogeny
Number of mutations	The total number of somatic mutations (SNVs and indels) across all samples in the phylogeny
Post-development nodes	The number of coalescences (branch points) that time to after after the period of initial development, defined as after 50 mutations of molecular time. This is an indicator of clonal complexity with the phylogeny
Smoking pack years	The average number of cigarette packs smoked each day (20 cigarettes per pack) multiplied by the number of years of smoking
Liver status	For the liver samples, whether the liver is known to have a histopathological abnormality
Concurrent cancer	For the liver samples, whether there is a known cancer diagnosis outside the samples undergoing WGS
Individual ID	Phylogeny ID	Sex	Age	Category	Study ID	Sample type	Number of samples	Number of mutations	Post-development nodes	Smoking status	Smoking pack years	Liver status	Concurrent cancer	Diabetic	Number of MAVs	Number of PVVs	Original study citation
PD4781	PD4781	Female	87	Adult_HSPC	MPN	single HSPC-derived colonies	49	18969	44	-	-	-	-	-	0	0	Williams, N. et al. Life histories of myeloproliferative neoplasms inferred from phylogenies. Nature 602, 162–168 (2022).
PD5117	PD5117	Female	81	Adult_HSPC	MPN	single HSPC-derived colonies	61	58702	40	-	-	-	-	-	0	4	Williams, N. et al. Life histories of myeloproliferative neoplasms inferred from phylogenies. Nature 602, 162–168 (2022).
PD5163	PD5163	Female	46	Adult_HSPC	MPN	single HSPC-derived colonies	71	42016	12	-	-	-	-	-	0	2	Williams, N. et al. Life histories of myeloproliferative neoplasms inferred from phylogenies. Nature 602, 162–168 (2022).
PD5179	PD5179	Male	61	Adult_HSPC	MPN	single HSPC-derived colonies	88	30250	83	-	-	-	-	-	2	4	Williams, N. et al. Life histories of myeloproliferative neoplasms inferred from phylogenies. Nature 602, 162–168 (2022).
PD5182	PD5182	Male	54	Adult_HSPC	MPN	single HSPC-derived colonies	160	92406	117	-	-	-	-	-	1	0	Williams, N. et al. Life histories of myeloproliferative neoplasms inferred from phylogenies. Nature 602, 162–168 (2022).
PD5847	PD5847	Female	50	Adult_HSPC	MPN	single HSPC-derived colonies	90	31122	80	-	-	-	-	-	2	2	Williams, N. et al. Life histories of myeloproliferative neoplasms inferred from phylogenies. Nature 602, 162–168 (2022).
PD6629	PD6629	Male	71	Adult_HSPC	MPN	single HSPC-derived colonies	58	28754	53	-	-	-	-	-	0	1	Williams, N. et al. Life histories of myeloproliferative neoplasms inferred from phylogenies. Nature 602, 162–168 (2022).
PD6646	PD6646	Male	87	Adult_HSPC	MPN	single HSPC-derived colonies	117	51464	114	-	-	-	-	-	3	17	Williams, N. et al. Life histories of myeloproliferative neoplasms inferred from phylogenies. Nature 602, 162–168 (2022).
PD7271	PD7271	Female	23	Adult_HSPC	MPN	single HSPC-derived colonies	77	29966	15	-	-	-	-	-	0	3	Williams, N. et al. Life histories of myeloproliferative neoplasms inferred from phylogenies. Nature 602, 162–168 (2022).
PD9478	PD9478	Female	76	Adult_HSPC	MPN	single HSPC-derived colonies	82	31377	72	-	-	-	-	-	1	10	Williams, N. et al. Life histories of myeloproliferative neoplasms inferred from phylogenies. Nature 602, 162–168 (2022).
PD34493	PD34493_FINAL	Male	83	Adult_HSPC	CH	single HSPC-derived colonies	93	68301	81	-	-	-	-	-	1	16	Fabre, M. A. et al. The longitudinal dynamics and natural history of clonal haematopoiesis. Nature 606, 335–342 (2022).
PD41276	PD41276_v2_FINAL_rho05	Female	79	Adult_HSPC	CH	single HSPC-derived colonies	85	31556	82	-	-	-	-	-	0	8	Fabre, M. A. et al. The longitudinal dynamics and natural history of clonal haematopoiesis. Nature 606, 335–342 (2022).
PD41305	PD41305_v3_FINAL	Male	73	Adult_HSPC	CH	single HSPC-derived colonies	92	89217	51	-	-	-	-	-	0	0	Fabre, M. A. et al. The longitudinal dynamics and natural history of clonal haematopoiesis. Nature 606, 335–342 (2022).
AX001	AX001_4_01	Male	63	Adult_HSPC	Ageing	single HSPC-derived colonies	361	304455	27	-	-	-	-	-	2	5	Mitchell, E. et al. Clonal dynamics of haematopoiesis across the human lifespan. Nature 606, 343–350 (2022).
CB001	CB001_3_01	Female	0	Foetal_HSPC	Ageing	single HSPC-derived colonies	195	5880	0	-	-	-	-	-	0	0	Mitchell, E. et al. Clonal dynamics of haematopoiesis across the human lifespan. Nature 606, 343–350 (2022).
CB002	CB002_2_01	Female	0	Foetal_HSPC	Ageing	single HSPC-derived colonies	379	11616	0	-	-	-	-	-	0	0	Mitchell, E. et al. Clonal dynamics of haematopoiesis across the human lifespan. Nature 606, 343–350 (2022).
KX001	KX001_4_01	Male	29	Adult_HSPC	Ageing	single HSPC-derived colonies	407	158948	14	-	-	-	-	-	1	0	Mitchell, E. et al. Clonal dynamics of haematopoiesis across the human lifespan. Nature 606, 343–350 (2022).
KX002	KX002_2_01	Male	38	Adult_HSPC	Ageing	single HSPC-derived colonies	380	189084	12	-	-	-	-	-	0	2	Mitchell, E. et al. Clonal dynamics of haematopoiesis across the human lifespan. Nature 606, 343–350 (2022).
KX003	KX003_5_01	Male	81	Adult_HSPC	Ageing	single HSPC-derived colonies	328	293367	189	-	-	-	-	-	6	34	Mitchell, E. et al. Clonal dynamics of haematopoiesis across the human lifespan. Nature 606, 343–350 (2022).
KX004	KX004_5_01	Female	77	Adult_HSPC	Ageing	single HSPC-derived colonies	922	662927	653	-	-	-	-	-	12	83	Mitchell, E. et al. Clonal dynamics of haematopoiesis across the human lifespan. Nature 606, 343–350 (2022).
KX007	KX007_2_01	Male	75	Adult_HSPC	Ageing	single HSPC-derived colonies	315	310307	112	-	-	-	-	-	5	9	Mitchell, E. et al. Clonal dynamics of haematopoiesis across the human lifespan. Nature 606, 343–350 (2022).
KX008	KX008_2_01	Female	76	Adult_HSPC	Ageing	single HSPC-derived colonies	367	316151	173	-	-	-	-	-	7	25	Mitchell, E. et al. Clonal dynamics of haematopoiesis across the human lifespan. Nature 606, 343–350 (2022).
KX009	KX009_1_01	Male	63	Adult_HSPC	Ageing	single HSPC-derived colonies	422	341179	146	-	-	-	-	-	1	16	Mitchell, E. et al. Clonal dynamics of haematopoiesis across the human lifespan. Nature 606, 343–350 (2022).
KX010	KX010_1_01	Female	60	Adult_HSPC	Ageing	single HSPC-derived colonies	231	226109	21	-	-	-	-	-	1	4	Mitchell, E. et al. Clonal dynamics of haematopoiesis across the human lifespan. Nature 606, 343–350 (2022).
PX001	PX001_2_01	Female	48	Chemo_HSPC	Chemo	single HSPC-derived colonies	259	589132	118	-	-	-	-	-	111	90	TO ADD WHEN HAVE PREPRINT REFERENCE
PX002	PX002_2_01	Female	63	Adult_HSPC	Chemo	single HSPC-derived colonies	174	175438	47	-	-	-	-	-	1	12	TO ADD WHEN HAVE PREPRINT REFERENCE
SX001	SX001_5_01	Male	48	Adult_HSPC	Ageing	single HSPC-derived colonies	362	235471	19	-	-	-	-	-	2	1	Mitchell, E. et al. Clonal dynamics of haematopoiesis across the human lifespan. Nature 606, 343–350 (2022).
PD26988	PD26988	Male	81	Bronchial	Lung	single bronchial epithlial cell-derived colonies	24	95412	5	Ex_smoker	90	-	-	-	2	2	Yoshida, K. et al. Tobacco smoking and somatic mutations in human bronchial epithelium. Nature 578, 266–272 (2020).
PD30160	PD30160	Male	71	Bronchial	Lung	single bronchial epithlial cell-derived colonies	11	29948	0	Ex_smoker	55	-	-	-	0	0	Yoshida, K. et al. Tobacco smoking and somatic mutations in human bronchial epithelium. Nature 578, 266–272 (2020).
PD34204	PD34204	Male	61	Bronchial	Lung	single bronchial epithlial cell-derived colonies	60	233313	39	Current_smoker	147	-	-	-	7	5	Yoshida, K. et al. Tobacco smoking and somatic mutations in human bronchial epithelium. Nature 578, 266–272 (2020).
PD34205	PD34205	Male	54	Bronchial	Lung	single bronchial epithlial cell-derived colonies	49	113097	14	Ex_smoker	16	-	-	-	0	0	Yoshida, K. et al. Tobacco smoking and somatic mutations in human bronchial epithelium. Nature 578, 266–272 (2020).
PD34206	PD34206	Male	76	Bronchial	Lung	single bronchial epithlial cell-derived colonies	54	146741	30	Ex_smoker	90	-	-	-	24	3	Yoshida, K. et al. Tobacco smoking and somatic mutations in human bronchial epithelium. Nature 578, 266–272 (2020).
PD34207	PD34207	Female	65	Bronchial	Lung	single bronchial epithlial cell-derived colonies	48	264717	21	Current_smoker	40	-	-	-	14	2	Yoshida, K. et al. Tobacco smoking and somatic mutations in human bronchial epithelium. Nature 578, 266–272 (2020).
PD34209	PD34209	Female	75	Bronchial	Lung	single bronchial epithlial cell-derived colonies	55	93689	22	Never_smoker	NA	-	-	-	0	1	Yoshida, K. et al. Tobacco smoking and somatic mutations in human bronchial epithelium. Nature 578, 266–272 (2020).
PD34210	PD34210	Female	68	Bronchial	Lung	single bronchial epithlial cell-derived colonies	45	136242	12	Ex_smoker	60	-	-	-	0	0	Yoshida, K. et al. Tobacco smoking and somatic mutations in human bronchial epithelium. Nature 578, 266–272 (2020).
PD34211	PD34211	Male	74	Bronchial	Lung	single bronchial epithlial cell-derived colonies	49	307796	36	Current_smoker	30	-	-	-	18	2	Yoshida, K. et al. Tobacco smoking and somatic mutations in human bronchial epithelium. Nature 578, 266–272 (2020).
PD34215	PD34215	Female	73	Bronchial	Lung	single bronchial epithlial cell-derived colonies	56	53288	32	Never_smoker	NA	-	-	-	5	2	Yoshida, K. et al. Tobacco smoking and somatic mutations in human bronchial epithelium. Nature 578, 266–272 (2020).
PD37451	PD37451	Female	80	Bronchial	Lung	single bronchial epithlial cell-derived colonies	30	52342	8	Never_smoker	NA	-	-	-	0	0	Yoshida, K. et al. Tobacco smoking and somatic mutations in human bronchial epithelium. Nature 578, 266–272 (2020).
PD37452	PD37452	Female	75	Bronchial	Lung	single bronchial epithlial cell-derived colonies	36	175427	14	Ex_smoker	50	-	-	-	5	1	Yoshida, K. et al. Tobacco smoking and somatic mutations in human bronchial epithelium. Nature 578, 266–272 (2020).
PD37453	PD37453	Male	3	Bronchial	Lung	single bronchial epithlial cell-derived colonies	30	4023	1	Child	NA	-	-	-	0	0	Yoshida, K. et al. Tobacco smoking and somatic mutations in human bronchial epithelium. Nature 578, 266–272 (2020).
PD37454	PD37454	Female	59	Bronchial	Lung	single bronchial epithlial cell-derived colonies	30	32098	14	Never_smoker	NA	-	-	-	0	0	Yoshida, K. et al. Tobacco smoking and somatic mutations in human bronchial epithelium. Nature 578, 266–272 (2020).
PD37455	PD37455	Female	0.9	Bronchial	Lung	single bronchial epithlial cell-derived colonies	27	2760	1	Child	NA	-	-	-	0	0	Yoshida, K. et al. Tobacco smoking and somatic mutations in human bronchial epithelium. Nature 578, 266–272 (2020).
PD37456	PD37456	Female	1	Bronchial	Lung	single bronchial epithlial cell-derived colonies	28	5990	2	Child	NA	-	-	-	1	0	Yoshida, K. et al. Tobacco smoking and somatic mutations in human bronchial epithelium. Nature 578, 266–272 (2020).
Pair11	Pair11	Male	74.8	Adult_HSPC	Transplant	single HSPC-derived colonies	326	178281	258	-	-	-	-	-	8	39	Campbell, P., Chapman, M. S., Wilk, M. & Boettcher, S. Clonal dynamics after allogeneic haematopoietic cell transplantation using genome-wide somatic mutations. Preprint (Research Square) rs-2868644, (2023).
Pair13	Pair13	Male	65.5	Adult_HSPC	Transplant	single HSPC-derived colonies	299	199749	122	-	-	-	-	-	3	5	Campbell, P., Chapman, M. S., Wilk, M. & Boettcher, S. Clonal dynamics after allogeneic haematopoietic cell transplantation using genome-wide somatic mutations. Preprint (Research Square) rs-2868644, (2023).
Pair21	Pair21	Female	64.5	Adult_HSPC	Transplant	single HSPC-derived colonies	353	223342	200	-	-	-	-	-	4	21	Campbell, P., Chapman, M. S., Wilk, M. & Boettcher, S. Clonal dynamics after allogeneic haematopoietic cell transplantation using genome-wide somatic mutations. Preprint (Research Square) rs-2868644, (2023).
Pair24	Pair24	Female	34.2	Adult_HSPC	Transplant	single HSPC-derived colonies	341	147547	10	-	-	-	-	-	1	1	Campbell, P., Chapman, M. S., Wilk, M. & Boettcher, S. Clonal dynamics after allogeneic haematopoietic cell transplantation using genome-wide somatic mutations. Preprint (Research Square) rs-2868644, (2023).
Pair25	Pair25	Male	58.4	Adult_HSPC	Transplant	single HSPC-derived colonies	344	236499	147	-	-	-	-	-	3	18	Campbell, P., Chapman, M. S., Wilk, M. & Boettcher, S. Clonal dynamics after allogeneic haematopoietic cell transplantation using genome-wide somatic mutations. Preprint (Research Square) rs-2868644, (2023).
Pair28	Pair28	Female	79.9	Adult_HSPC	Transplant	single HSPC-derived colonies	245	123237	190	-	-	-	-	-	4	27	Campbell, P., Chapman, M. S., Wilk, M. & Boettcher, S. Clonal dynamics after allogeneic haematopoietic cell transplantation using genome-wide somatic mutations. Preprint (Research Square) rs-2868644, (2023).
Pair31	Pair31	Female	65.2	Adult_HSPC	Transplant	single HSPC-derived colonies	198	138802	133	-	-	-	-	-	4	13	Campbell, P., Chapman, M. S., Wilk, M. & Boettcher, S. Clonal dynamics after allogeneic haematopoietic cell transplantation using genome-wide somatic mutations. Preprint (Research Square) rs-2868644, (2023).
Pair38	Pair38	Female	65.8	Adult_HSPC	Transplant	single HSPC-derived colonies	254	142418	71	-	-	-	-	-	4	4	Campbell, P., Chapman, M. S., Wilk, M. & Boettcher, S. Clonal dynamics after allogeneic haematopoietic cell transplantation using genome-wide somatic mutations. Preprint (Research Square) rs-2868644, (2023).
Pair40	Pair40	Female	51.9	Adult_HSPC	Transplant	single HSPC-derived colonies	281	191324	46	-	-	-	-	-	1	5	Campbell, P., Chapman, M. S., Wilk, M. & Boettcher, S. Clonal dynamics after allogeneic haematopoietic cell transplantation using genome-wide somatic mutations. Preprint (Research Square) rs-2868644, (2023).
Pair41	Pair41	Female	42.4	Adult_HSPC	Transplant	single HSPC-derived colonies	281	143643	4	-	-	-	-	-	0	1	Campbell, P., Chapman, M. S., Wilk, M. & Boettcher, S. Clonal dynamics after allogeneic haematopoietic cell transplantation using genome-wide somatic mutations. Preprint (Research Square) rs-2868644, (2023).
18pcw	18pcw	Male	0	Foetal_HSPC	Foetal	single HSPC-derived colonies	234	5872	0	-	-	Normal	None	-	2	0	Spencer Chapman, M. et al. Lineage tracing of human development through somatic mutations. Nature 595, 85–90 (2021).
8pcw	8pcw	Male	0	Foetal_HSPC	Foetal	single HSPC-derived colonies	277	4166	0	-	-	Normal	None	-	0	1	Spencer Chapman, M. et al. Lineage tracing of human development through somatic mutations. Nature 595, 85–90 (2021).
PD36713	PD36713b	Male	67.2	Liver	Liver	liver parenchyma laser capture microdissections	32	20094	2	Never_smoker	-	Normal	CRC	No	0	-	Ng, S. W. K. et al. Convergent somatic mutations in metabolism genes in chronic liver disease. Nature 598, 473–478 (2021).
PD36714	PD36714b	Male	77.1	Liver	Liver	liver parenchyma laser capture microdissections	27	29140	1	Ex_smoker	-	Normal	CRC	No	0	-	Ng, S. W. K. et al. Convergent somatic mutations in metabolism genes in chronic liver disease. Nature 598, 473–478 (2021).
PD36715	PD36715b	Male	64.1	Liver	Liver	liver parenchyma laser capture microdissections	28	17341	4	Never_smoker	-	Normal	CRC	No	0	-	Ng, S. W. K. et al. Convergent somatic mutations in metabolism genes in chronic liver disease. Nature 598, 473–478 (2021).
PD36717	PD36717b	Male	72.9	Liver	Liver	liver parenchyma laser capture microdissections	29	38205	0	Ex_smoker	-	Normal	CRC	No	0	-	Ng, S. W. K. et al. Convergent somatic mutations in metabolism genes in chronic liver disease. Nature 598, 473–478 (2021).
PD36718	PD36718b	Male	49.1	Liver	Liver	liver parenchyma laser capture microdissections	26	12330	0	Never_smoker	-	Normal	CRC	No	0	-	Ng, S. W. K. et al. Convergent somatic mutations in metabolism genes in chronic liver disease. Nature 598, 473–478 (2021).
PD37105	PD37105b	Female	65.4	Liver	Liver	liver parenchyma laser capture microdissections	26	58875	10	Never_smoker	-	ARLD	HCC	Diet-controlled	1	-	Ng, S. W. K. et al. Convergent somatic mutations in metabolism genes in chronic liver disease. Nature 598, 473–478 (2021).
PD37107	PD37107b	Male	43.4	Liver	Liver	liver parenchyma laser capture microdissections	13	54247	5	Ex_smoker	-	ARLD	HCC	No	1	-	Ng, S. W. K. et al. Convergent somatic mutations in metabolism genes in chronic liver disease. Nature 598, 473–478 (2021).
PD37110	PD37110b	Male	65.8	Liver	Liver	liver parenchyma laser capture microdissections	21	36411	5	Ex_smoker	-	ARLD	HCC	No	1	-	Ng, S. W. K. et al. Convergent somatic mutations in metabolism genes in chronic liver disease. Nature 598, 473–478 (2021).
PD37111	PD37111b	Male	67.4	Liver	Liver	liver parenchyma laser capture microdissections	29	203777	11	Current_smoker	-	ARLD	HCC	No	4	-	Ng, S. W. K. et al. Convergent somatic mutations in metabolism genes in chronic liver disease. Nature 598, 473–478 (2021).
PD37113	PD37113b	Male	65.2	Liver	Liver	liver parenchyma laser capture microdissections	28	28218	10	Ex_smoker	-	NAFLD	HCC	Diet-controlled	0	-	Ng, S. W. K. et al. Convergent somatic mutations in metabolism genes in chronic liver disease. Nature 598, 473–478 (2021).
PD37114	PD37114b	Male	61.5	Liver	Liver	liver parenchyma laser capture microdissections	28	60774	7	Current_smoker	-	NAFLD	HCC	Insulin-controlled	0	-	Ng, S. W. K. et al. Convergent somatic mutations in metabolism genes in chronic liver disease. Nature 598, 473–478 (2021).
PD37115	PD37115b	Male	64.8	Liver	Liver	liver parenchyma laser capture microdissections	19	16567	11	Current_smoker	-	NAFLD	HCC	No	0	-	Ng, S. W. K. et al. Convergent somatic mutations in metabolism genes in chronic liver disease. Nature 598, 473–478 (2021).
PD37116	PD37116b	Male	66.6	Liver	Liver	liver parenchyma laser capture microdissections	22	52819	4	Current_smoker	-	NAFLD	HCC	No	0	-	Ng, S. W. K. et al. Convergent somatic mutations in metabolism genes in chronic liver disease. Nature 598, 473–478 (2021).
PD37118	PD37118b	Male	61.1	Liver	Liver	liver parenchyma laser capture microdissections	24	45566	9	Ex_smoker	-	NAFLD	HCC	Tablet-controlled	1	-	Ng, S. W. K. et al. Convergent somatic mutations in metabolism genes in chronic liver disease. Nature 598, 473–478 (2021).
PD37230	PD37230b	Male	58.3	Liver	Liver	liver parenchyma laser capture microdissections	24	21904	0	Never_smoker	-	ARLD	None	No	0	-	Ng, S. W. K. et al. Convergent somatic mutations in metabolism genes in chronic liver disease. Nature 598, 473–478 (2021).
PD37231	PD37231b	Male	45.3	Liver	Liver	liver parenchyma laser capture microdissections	20	112923	7	Current_smoker	-	ARLD	None	No	1	-	Ng, S. W. K. et al. Convergent somatic mutations in metabolism genes in chronic liver disease. Nature 598, 473–478 (2021).
PD37232	PD37232b	Female	40.7	Liver	Liver	liver parenchyma laser capture microdissections	26	58656	3	Ex_smoker	-	ARLD	None	No	0	-	Ng, S. W. K. et al. Convergent somatic mutations in metabolism genes in chronic liver disease. Nature 598, 473–478 (2021).
PD37234	PD37234b	Female	37.9	Liver	Liver	liver parenchyma laser capture microdissections	30	44402	5	Current_smoker	-	ARLD	None	No	0	-	Ng, S. W. K. et al. Convergent somatic mutations in metabolism genes in chronic liver disease. Nature 598, 473–478 (2021).
PD37237	PD37237b	Male	50.8	Liver	Liver	liver parenchyma laser capture microdissections	29	48792	4	Ex_smoker	-	ARLD	None	No	0	-	Ng, S. W. K. et al. Convergent somatic mutations in metabolism genes in chronic liver disease. Nature 598, 473–478 (2021).
PD37238	PD37238b	Male	46	Liver	Liver	liver parenchyma laser capture microdissections	26	82905	8	Current_smoker	-	NAFLD	None	Tablet-controlled	4	-	Ng, S. W. K. et al. Convergent somatic mutations in metabolism genes in chronic liver disease. Nature 598, 473–478 (2021).
PD37239	PD37239b	Female	56.7	Liver	Liver	liver parenchyma laser capture microdissections	20	122164	7	Never_smoker	-	NAFLD	None	Tablet-controlled	1	-	Ng, S. W. K. et al. Convergent somatic mutations in metabolism genes in chronic liver disease. Nature 598, 473–478 (2021).
PD37240	PD37240b	Male	61.2	Liver	Liver	liver parenchyma laser capture microdissections	26	82115	9	Never_smoker	-	NAFLD	None	Tablet-controlled	0	-	Ng, S. W. K. et al. Convergent somatic mutations in metabolism genes in chronic liver disease. Nature 598, 473–478 (2021).
PD37243	PD37243b	Male	28.6	Liver	Liver	liver parenchyma laser capture microdissections	32	31970	12	Never_smoker	-	NAFLD	None	No	3	-	Ng, S. W. K. et al. Convergent somatic mutations in metabolism genes in chronic liver disease. Nature 598, 473–478 (2021).
PD37245	PD37245b	Male	42.4	Liver	Liver	liver parenchyma laser capture microdissections	19	18083	4	Never_smoker	-	NAFLD	None	No	0	-	Ng, S. W. K. et al. Convergent somatic mutations in metabolism genes in chronic liver disease. Nature 598, 473–478 (2021).
PD37904	PD37904b	Male	73.7	Liver	Liver	liver parenchyma laser capture microdissections	32	70028	9	Never_smoker	-	NAFLD	HCC	Tablet-controlled	0	-	Ng, S. W. K. et al. Convergent somatic mutations in metabolism genes in chronic liver disease. Nature 598, 473–478 (2021).
PD37907	PD37907b	Male	76.1	Liver	Liver	liver parenchyma laser capture microdissections	35	39498	1	Ex_smoker	-	NAFLD	HCC	No	0	-	Ng, S. W. K. et al. Convergent somatic mutations in metabolism genes in chronic liver disease. Nature 598, 473–478 (2021).
PD37909	PD37909b	Male	76.2	Liver	Liver	liver parenchyma laser capture microdissections	31	63195	5	Never_smoker	-	NAFLD	HCC	No	0	-	Ng, S. W. K. et al. Convergent somatic mutations in metabolism genes in chronic liver disease. Nature 598, 473–478 (2021).
PD37910	PD37910b	Male	71.3	Liver	Liver	liver parenchyma laser capture microdissections	26	66537	8	Ex_smoker	-	NAFLD	HCC	Insulin-controlled	1	-	Ng, S. W. K. et al. Convergent somatic mutations in metabolism genes in chronic liver disease. Nature 598, 473–478 (2021).
PD37914	PD37914b	Female	69.7	Liver	Liver	liver parenchyma laser capture microdissections	25	33286	2	Never_smoker	-	NAFLD	HCC	Tablet-controlled	0	-	Ng, S. W. K. et al. Convergent somatic mutations in metabolism genes in chronic liver disease. Nature 598, 473–478 (2021).
PD37915	PD37915b	Male	69.2	Liver	Liver	liver parenchyma laser capture microdissections	24	44774	10	Ex_smoker	-	NAFLD	HCC	Tablet-controlled	1	-	Ng, S. W. K. et al. Convergent somatic mutations in metabolism genes in chronic liver disease. Nature 598, 473–478 (2021).
PD37917	PD37917b	Male	72	Liver	Liver	liver parenchyma laser capture microdissections	21	46043	2	Current_smoker	-	ARLD	HCC	No	0	-	Ng, S. W. K. et al. Convergent somatic mutations in metabolism genes in chronic liver disease. Nature 598, 473–478 (2021).
PD37918	PD37918b	Male	66.2	Liver	Liver	liver parenchyma laser capture microdissections	33	76579	3	Ex_smoker	-	NAFLD	HCC	Diet-controlled	2	-	Ng, S. W. K. et al. Convergent somatic mutations in metabolism genes in chronic liver disease. Nature 598, 473–478 (2021).
PD48367	PD48367b	Male	68.7	Liver	Liver	liver parenchyma laser capture microdissections	20	54757	14	Ex_smoker	-	NAFLD	None	Tablet-controlled	5	-	Ng, S. W. K. et al. Convergent somatic mutations in metabolism genes in chronic liver disease. Nature 598, 473–478 (2021).
PD48367	PD48367c	Male	68.7	Liver	Liver	liver parenchyma laser capture microdissections	17	140911	17	Ex_smoker	-	NAFLD	None	Tablet-controlled	2	-	Ng, S. W. K. et al. Convergent somatic mutations in metabolism genes in chronic liver disease. Nature 598, 473–478 (2021).
PD48367	PD48367d	Male	68.7	Liver	Liver	liver parenchyma laser capture microdissections	15	104360	15	Ex_smoker	-	NAFLD	None	Tablet-controlled	2	-	Ng, S. W. K. et al. Convergent somatic mutations in metabolism genes in chronic liver disease. Nature 598, 473–478 (2021).
PD48367	PD48367e	Male	68.7	Liver	Liver	liver parenchyma laser capture microdissections	22	91675	13	Ex_smoker	-	NAFLD	None	Tablet-controlled	2	-	Ng, S. W. K. et al. Convergent somatic mutations in metabolism genes in chronic liver disease. Nature 598, 473–478 (2021).
PD48367	PD48367f	Male	68.7	Liver	Liver	liver parenchyma laser capture microdissections	18	68126	5	Ex_smoker	-	NAFLD	None	Tablet-controlled	0	-	Ng, S. W. K. et al. Convergent somatic mutations in metabolism genes in chronic liver disease. Nature 598, 473–478 (2021).
PD48367	PD48367g	Male	68.7	Liver	Liver	liver parenchyma laser capture microdissections	21	121416	11	Ex_smoker	-	NAFLD	None	Tablet-controlled	3	-	Ng, S. W. K. et al. Convergent somatic mutations in metabolism genes in chronic liver disease. Nature 598, 473–478 (2021).
PD48367	PD48367h	Male	68.7	Liver	Liver	liver parenchyma laser capture microdissections	17	95016	9	Ex_smoker	-	NAFLD	None	Tablet-controlled	1	-	Ng, S. W. K. et al. Convergent somatic mutations in metabolism genes in chronic liver disease. Nature 598, 473–478 (2021).
PD48367	PD48367i	Male	68.7	Liver	Liver	liver parenchyma laser capture microdissections	24	133680	12	Ex_smoker	-	NAFLD	None	Tablet-controlled	1	-	Ng, S. W. K. et al. Convergent somatic mutations in metabolism genes in chronic liver disease. Nature 598, 473–478 (2021).
PD48372	PD48372b	Male	68.2	Liver	Liver	liver parenchyma laser capture microdissections	18	42852	11	Ex_smoker	-	NAFLD	None	Tablet-controlled	4	-	Ng, S. W. K. et al. Convergent somatic mutations in metabolism genes in chronic liver disease. Nature 598, 473–478 (2021).
PD48372	PD48372c	Male	68.2	Liver	Liver	liver parenchyma laser capture microdissections	23	58879	16	Ex_smoker	-	NAFLD	None	Tablet-controlled	4	-	Ng, S. W. K. et al. Convergent somatic mutations in metabolism genes in chronic liver disease. Nature 598, 473–478 (2021).
PD48372	PD48372d	Male	68.2	Liver	Liver	liver parenchyma laser capture microdissections	19	68587	14	Ex_smoker	-	NAFLD	None	Tablet-controlled	2	-	Ng, S. W. K. et al. Convergent somatic mutations in metabolism genes in chronic liver disease. Nature 598, 473–478 (2021).
PD48372	PD48372e	Male	68.2	Liver	Liver	liver parenchyma laser capture microdissections	17	56679	9	Ex_smoker	-	NAFLD	None	Tablet-controlled	1	-	Ng, S. W. K. et al. Convergent somatic mutations in metabolism genes in chronic liver disease. Nature 598, 473–478 (2021).
PD48372	PD48372f	Male	68.2	Liver	Liver	liver parenchyma laser capture microdissections	19	50138	12	Ex_smoker	-	NAFLD	None	Tablet-controlled	5	-	Ng, S. W. K. et al. Convergent somatic mutations in metabolism genes in chronic liver disease. Nature 598, 473–478 (2021).
PD48372	PD48372g	Male	68.2	Liver	Liver	liver parenchyma laser capture microdissections	22	65784	11	Ex_smoker	-	NAFLD	None	Tablet-controlled	3	-	Ng, S. W. K. et al. Convergent somatic mutations in metabolism genes in chronic liver disease. Nature 598, 473–478 (2021).
PD48372	PD48372h	Male	68.2	Liver	Liver	liver parenchyma laser capture microdissections	22	60743	10	Ex_smoker	-	NAFLD	None	Tablet-controlled	2	-	Ng, S. W. K. et al. Convergent somatic mutations in metabolism genes in chronic liver disease. Nature 598, 473–478 (2021).
PD48372	PD48372i	Male	68.2	Liver	Liver	liver parenchyma laser capture microdissections	14	32252	11	Ex_smoker	-	NAFLD	None	Tablet-controlled	1	-	Ng, S. W. K. et al. Convergent somatic mutations in metabolism genes in chronic liver disease. Nature 598, 473–478 (2021).
